# Supplementary material for: Functional resolution of duplicatedhoxb5genes in teleosts
Source: Oxford University Press journal article supplement (doi:10.1242/dev.025817), 2008-10-03
Supplement: dev025817-sup-025817figs1.pdf [file dev025817-sup-025817figs1.pdf]

>MmJ1

CCCAAAGTCGCTATGACATTTAGATGTCAAATGGATAGGGGTTTTATCTCGA  
AGTTAGATCGTAAAAATCGCCGAGAAGTCAGACAGATACCCCTCACTGGCTC  
GAGAAAGTCACGTGAGGTCCATAAAGTTAGTTTTATGGTTTTGGGGAGTTGA  
CACCGCGCGGTATATTTACATTCTCCAGAATGTTAAGTGACACTTTAACTGC  
TCACTGTGGTGGGGAAGGGG

>DrJ1a

ACAAAAGTAGCTATGACATTTACATGTCAAACGGATGAGCGTTTTATCTTG  
AAGTTAGATCGTAAAAATCGCCCAGGCCACAGACAGATACCCCTTACTGGCT  
CTCAAAGTCACGTGGGGTCCATAAAGTTAGTTTTATGGTTTTGGGGAGTTGA  
CAATGTACTATATATTTACATTCTAGAATGCAAGTGACGGTTAACTGCTTC  
GAGGGGATTCTAAAGGGT

>TrJ1a

AAAGAAGGGAGCTTTGACATTTACATGTCAAACGGATGAAGGTTTTTTTTTTT  
TTTTTCATCTCCAAGTTGGCTCGTAAAGATCAGCCAAGGCCTCAAATGATAC  
CTCTCACTGGCTCTCCGTTGTACGTGGGGTCCATAAAGTTAGTTTTATGGT  
TTTGGGGAGTTGACAATGTACTATATATTTACATTCTAGAAAGCAAGTGACG  
GTTAACGGCTTCGCGGGGATCCTAAAGGGG

>DrJ1b

TAACATTCTGCCCTATTTGTATGAAACACAACAGATAAATCATCTTCCCCGAT  
TATTTTCTTCTGAAGTTCAGTCCATAACACCAACATGTAGCACTTGGTAGCTC  
TAAAAAAGTCACGTGAGGTCCATAAAGTTAGTTTTATGGTTTTAGGGGGGT  
GAAAATGCGCTACATAATTCACATTCTTGAATGTAAGTACTGCTTTAACTGCT  
TTCAGCGGGATTCTAAAGGTT

>TrJ1b

GAAAATACACGCGTGTGCCTTTGGCTTACATGTACATAGGCGAGGCTGAGGT  
TAAAAAAAATCCCCCTTGCCAAAGATCGTATAGGCCTATATTACTTACAG  
ACGGTGAAAAGTCACGTGAGGTCCATAAAGTTGGTTTTATGGTTTTGGGGAG  
TAGACAATGTACAATATAATTCACAACCTTGAATGAAAGTGACGGCTTAACT  
GCGTGGATGGGACTGGAAGGCT

>MmJ2

AGCTATTCTCAACGATTAAATCGCCATTTTAAACAATATAATGGAGTTTGCATC  
CTGAAAGGGGAAATCAACGCTCATATCTCATCAATAATTCATAGAGTCCGGG  
ATCACGCAGAGGTCAGCAGACGGGGGTGGAGGGGTGCGAGC

>DrJ2a

AGCAATTTTAAACGTTTAAATAGCAATTTTGAGACTAATGCTTTTTGCATATT  
GATAGGAGCAATCTGCGAGCATATCTCATCCATAATGCATAGGGACAGGATC  
ATCCAAGGGTCAGCAGACGGGAGCTGCTGCGAAGGCGCAAGC

>TrJ2a

CGATGGCCTTAGATTTAAGCTGGCATTGAAAAGCCCTAATGTCTTCTGCATA  
CTGATAGGGGTAAACCGCACCGGCACGCCTCATGAATAATGCAGGAGTAAGA  
GTCATCGGGAGGTCAGCAGACACGCACTGAACAAGGAGACTGC

>DrJ2b

TTCGATTCATAACTATTAAGTCCCATTTTGCCTCTATAATGCGTTTTGCATAT  
TGATAGGGTAATCTGGGCGCTGTTCTCATCAATTATTCATTGGGAAGGGATCA  
CTCGGAGGTCAGTAGACGAAAGTGGCAAACATGCCTTC

>TrJ2b

ACATATTCATAACTATTAAGTGGCAATTTAAGCAGCGTAATGAGTATTGCATA  
TTGATAGGGGTAAATCTGTAGCCGGATCTCATGCATGATTCATGCCGGCGGGG  
ATCATCGCTGGGTCCTAGACGAGCTGCTGCAGCCGCAGATGC

>MmJ3

GAATCAAATCCTGCTCTGTCGTTTTTCTCCCAAGTAATGACCTGCGCAAAT  
CAATATGACCGAGCGAACTGCGTGAGCATATTATACTAACTGCCTGCTCGTG  
GGGGAGGCCCGGAGAGGGGTGAACCGCAGGTCACGGCGTCTAAAAATTATT  
AAAATGTTGAGAACCTCGTGACGCGCCTGCTGTTTAAACAAAGACTGCCAAA  
GTATGAGATTAATACGAAAACCTTGCTCTTCAAAAACAAAA

>DrJ3a

GAATGACCCCCTTCTCGAGCCATTTTTCTTCAAAGTAATGACCTGGGCACAAT  
TCAATATGAGCCAGCAAACCTATGCATGCATTACTATAGAACCTTAGAGTGGG  
AGAGACCCAGAGTAGGGGTGAACCGGAGGTCAGTGCGTCTAACAAATATTA  
AAATGTACTGGGACTCGTGACACGCCTCGCTGTTTAAACAAAGACTGCCAAAG  
TGCGAGATTAATATGAAAACCTTGAGAGTCCACAACAAAA

>TrJ3a

GGGGGGAATGGTGAGAGAAGGCAGTGCGGGAGAGGTGGAAATGGCCGAATG  
AAAGGGTGTGGAAGAGGGAGGGGGTGTGGGTGAGGAAGAGAGGGGACGGT  
GGGGTGGGGTGGGCTTGGCTGTGTGCGGGGTGAACGAGAGGTCAGCGCGTCT  
CACCAATATTAATAATGTGTACCGGGGACGCGGGGGTGACACGCCTCGCCCGT  
TAAACAAAGAGTGTGCCAAACTGGCAGATTAATTTGAAAACCTTGAGTCCACG  
CACACACAC

MmJ1 CCCAAAAGTCGCTATGACATTTAGATGTCA---AATGGATAGGGGTTTT-----  
TrJ1a AAAGAAGGGAGCTTTGACATTTACATGTCA---AACGGATGAAGGTTTTTTTTTTTTTT  
DrJ1a ACAAAAAGTAGCTATGACATTTACATGTCA---AACGGATGAGCGTTTT-----  
DrJ1b ----TAAcATTCTGCCCTATTTGTATGAAACACAACAGATAAAATCATCT-----  
TrJ1b GAAAATACACGCGTGTGCCTTTGGCTTACA---TGTACATAGGCGAGGCTG-----  
\* \*\* \* \*

MmJ1 --ATCTCGAA-GTTAGATCGTAAAAATC-GCCGAGAAGTCAGACAGATACCCCTCACTGG  
TrJ1a TCATCTCCAA-GTTGGCTCGTAAAGATCAGCCAAGGCCTCAAAATGATACCTCTCACTGG  
DrJ1a --ATCTTGAA-GTTAGATCGTAAAAATC-GCCCAGGCCACAGACAGATACCCCTTACTGG  
DrJ1b --TCCCGATTATTTCTTCTGAAGTTCAGTCCATAACACCAACATGTAGCACTTGGTAG  
TrJ1b --AGGTTAAA-AAAAAATCCCCCTTGCCAAAGATCGTATAGGCCTATATTACTTACAGA  
\* \* \* \* \*\* \*\*

MmJ1 CTCGA-GAAAGTCACGTGAGGTCCATAAAAGTTAGTTTTATGGTTTT-GGGGAGTTGACAC  
TrJ1a CTCTCCGCTTGTACGTTGGGTCCATAAAAGTTAGTTTTATGGTTTT-GGGGAGTTGACAA  
DrJ1a CTCTC-AAAAGTCACGTGAGGTCCATAAAAGTTAGTTTTATGGTTTT-GGGGAGTTGACAA  
DrJ1b CTCTAAAAAAGTCACGTGAGGTCCATAAAAGTTAGTTTTATGGTTTTAGGGGGTTGAAAA  
TrJ1b CCGTG-AAAAGTCACGTGAGGTCCATAAAAGTTGGTTTTATGGTTTT-GGGGAGTAGACAA  
\* \*\*\*\*\* \*\*\*\*\* \*\*\*\*\* \*\*\*\*\* \*\* \* \* \*

MmJ1 CGCGCGGTATATTTACATTCTCCAGAATGTTAAGTGACACTTAACTGCT--CACTGTG  
TrJ1a TGTACTATATATTTACATTCT--AGAAAGC-AAGTGACGGTTAAACGGCTT-CGCGGGG  
DrJ1a TGTACTATATATTTACATTCT--AGAATGC-AAGTGACGGTTAACTGCTT-CGAGGGG  
DrJ1b TGCGCTACATAAATTCACATTCT--TGAATGT-AACTGACTGTTAACTGCTTTCAGCGGG  
TrJ1b TGTACAATATAAATTCACAACCT--TGAATGA-AAGTGACGGCTTAACTGCGT-GGATGGG  
\* \* \*\*\* \*\*\*\*\* \*\* \*\*\* \* \* \* \* \* \* \* \* \* \* \* \*

MmJ1 GTGGGGAAGGGG  
TrJ1a ATCCTAAAGGGG  
DrJ1a ATTCTAAAGGGT  
DrJ1b ATTCTAAAGGTT  
TrJ1b ACTGGAAGGCT  
\* \* \* \*

MmJ2 AGCTATTCTCAACGATTAAATCGCCATTTTAAACAATATAATGGAGTTTGCATCCTGAAAG  
DrJ2b TTCGATTCATAACTATTAAGTCCCATTTTGCCCTATAATGCGTTTTGCATATTGATAG  
DrJ2a AGCAATTTTAAACGTTTAAATAGCAATTTTGAGACT--AATGCTTTTTGCATATTGATAG  
TrJ2b ACATATTCATAACTATTAAGTGGCAATTTAAGCAGCGTAATGAGTATTGCATATTGATAG  
TrJ2a CGATGGCCTTAGATTTAAGCTGGCATTTGAAAAGCCCTAATGTCTTCTGCATACTGATAG  
\* \* \* \* \* \* \* \* \* \* \* \* \* \* \* \* \* \* \* \*

MmJ2 GGGAAATCAACGC--TCATATCTCATCAATAATTCATAGAGTCCGGGATCACGCAGAGGT  
DrJ2b GGTAATCTGGGC--GCTGTTCTCATCAATTATTCATTGGGAA--GGGATCACTCGGAGGT  
DrJ2a GAGCAATCTGCGA--GCATATCTCATCCATAATGCATAGGGAC--AGGATCATCCAAGGGT  
TrJ2b GGGTAATCTGTAG--CCGGATCTCATGCATGATTCATGCCGGCGGGGATCATCGCTGGGT  
TrJ2a GGGTAAACCGCACCGGCACGCCTCATGAATAATGCA--GGAGTAAGAGTCATCGGGAGGT  
\* \* \* \* \* \* \* \* \* \* \* \* \* \* \* \* \* \* \* \*

MmJ2 CAGCAGACGGGGTGG---AGGGGTGCGAGC  
DrJ2b CAGTAGACGAAAGTGGC---AAACATGCCTTC  
DrJ2a CAGCAGACGGGAGCTGCTGCGAAGGCGCAAGC  
TrJ2b CACTAGACG--AGCTGCTGCAGCCGCAGATGC  
TrJ2a CAGCAGACGCACTGA--ACAAGGAGACTGC  
\*\* \* \* \* \* \* \* \* \*

MmJ3 GAATCAAATCCTGCTCT-GTCGTTTTTCTCCCAAGTAATGACCTGCGCAAAATTC AATAT  
DrJ3a GAATGACCCCCTTCTCGAGCCATTTTTCTTCAAAGTAATGACCTGGGCACAATTCAATAT  
TrJ3a GGGGGGAATGGTGAGAGAAGGCAGTGC GGGAGAGGTGAAATGGCCGAATGAAAGGGTGT  
\* \* \* \* \* \* \* \* \* \* \* \*

MmJ3 GACCGAGCGAACTG-CGTGAGCATATTATACTA-ACTGCCTGCTCGTGGGGGAGGCCCGG  
DrJ3a GAGCCAGCAAATA-TGCATGCAT----TACTATAGA ACTTTAGAGTGGGAGAGACCCAG  
TrJ3a GGAAGAGGGAGGGGTGTGGGTGAGG-AAGAGAGGGGACGGTGGGGTGGGTGGGCTTGG  
\* \* \* \* \* \* \* \* \* \* \* \* \* \* \* \*

MmJ3 ----AG-AGGGGTGAACCGCAGGTCACGGCGTCTAAAAATTATTA AATGT---TCGAGA  
DrJ3a ----AGTAGGGGTGAACCGGAGGTCAGTGCCTAACA AATATTA AATGT---ACTGGG  
TrJ3a CTGTGTGCGGGGTGAACGAGAGGTCACGGCGTCTACCA ATATTA AATGTGTACCGGGG  
\* \* \* \* \* \* \* \* \* \* \* \* \* \* \* \* \* \* \* \* \* \*

MmJ3 ACCTCG---TGACGCGCCT-GCT-GTTTAA CAAAGACTG--CCAAAGTATGAGATTAATA  
DrJ3a AC-TCG---TGACACGCCTCGCT-GTTTAA CAAAGACTG--CCAAAGTGCAGATTAATA  
TrJ3a ACGCGGGGTGACACGCCTCGCCCGTTAAACA AAGAGTGTGCCAAACTGGCAGATTAATT  
\* \* \* \* \* \* \* \* \* \* \* \* \* \* \* \* \* \* \* \* \* \*

MmJ3 CGAAA ACTTGCTCTTCAAAA-ACAAA  
DrJ3a TGAAA ACTTGAGAGTCCACA-ACAAA  
TrJ3a TGAAA ACTTGAGTCCACGCACACAC  
\* \* \* \* \* \* \* \* \* \* \* \* \* \* \* \*
