# Supplementary material for: Functional resolution of duplicatedhoxb5genes in teleosts
Source: Oxford University Press journal article supplement (doi:10.1242/dev.025817), 2008-10-03
Supplement: dev025817supptable.pdf [file dev025817supptable.pdf]

**Table S1. Percentage identity for 5' *Hoxb5* promoter region, J1, J2 and J3 in pairwise sequence comparisons**

| <b>J1%,<br/>255 bp</b> | <b>5' pr%,<br/>129 bp</b> | <i>MmHoxb5</i> | <i>HsHOXB5</i> | <i>Drhoxb5a</i> | <i>Drhoxb5b</i> | <i>Trhoxb5a</i> | <i>Trhoxb5b</i> |
|------------------------|---------------------------|----------------|----------------|-----------------|-----------------|-----------------|-----------------|
| <i>MmHoxb5</i>         |                           |                | 94             | 86.4            | 79.7            | 71.4            | 80.5            |
| <i>HsHOXB5</i>         |                           | 98.7           |                | 79.8            | 77.2            | 72.4            | 76.4            |
| <i>Drhoxb5a</i>        |                           | 80.8           | 80.3           |                 | 93.5            | 70.1            | 91              |
| <i>Drhoxb5b</i>        |                           | 57.9           | 58.6           | 64.7            |                 | 68.6            | 93.5            |
| <i>Trhoxb5a</i>        |                           | 73.6           | 73.9           | 85.5            | 61.4            |                 | 72.8            |
| <i>Trhoxb5b</i>        |                           | 56.2           | 57.8           | 63              | 60              | 57.4            |                 |

| <b>J3%,<br/>257 bp</b> | <b>J2%,<br/>151 bp</b> | <i>MmHoxb5</i> | <i>HsHOXB5</i> | <i>Drhoxb5a</i> | <i>Drhoxb5b</i> | <i>Trhoxb5a</i> | <i>Trhoxb5b</i> |
|------------------------|------------------------|----------------|----------------|-----------------|-----------------|-----------------|-----------------|
| <i>MmHoxb5</i>         |                        |                | 90             | 65.8            | 65.8            | 45.7            | 58.3            |
| <i>HsHOXB5</i>         |                        | 91             |                | 68              | 68              | 47              | 63.8            |
| <i>Drhoxb5a</i>        |                        | 77.6           | 72.4           |                 | 66.9            | 57.5            | 69.2            |
| <i>Drhoxb5b</i>        |                        | -              | -              | -               |                 | 51.7            | 46.7            |
| <i>Trhoxb5a</i>        |                        | 48.6           | 50.4           | 55.6            | -               |                 | 57              |
| <i>Trhoxb5b</i>        |                        | -              | -              | -               | -               | -               |                 |
