# Supplementary figures and images for: Functional resolution of duplicatedhoxb5genes in teleosts
Source: Oxford University Press journal article supplement (doi:10.1242/dev.025817), 2008-10-03

*hoxb5lacZ*

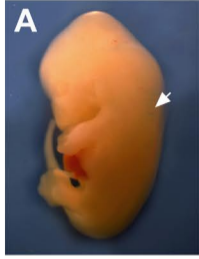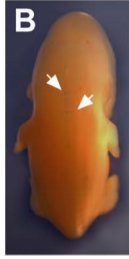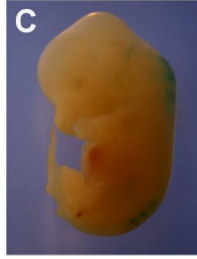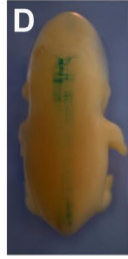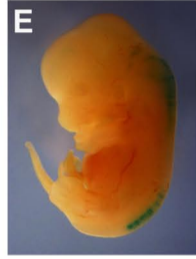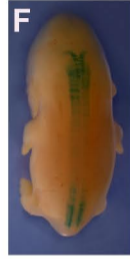

*hoxb5aΔJ3lacZ*

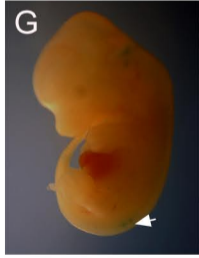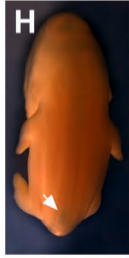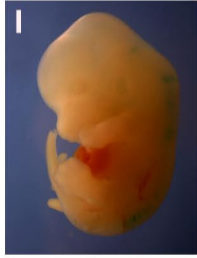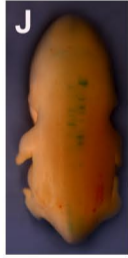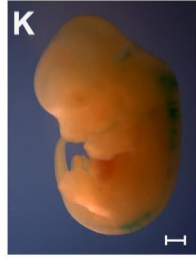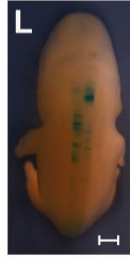

Supplement: dev025817-sup-025817figs2.pdf [file dev025817-sup-025817figs2.pdf]
